# Supplementary material
Source: publisher figshare collection journal article supplement (https://acs.figshare.com/ndownloader/files/23108231)
Supplement: Supplementary file 1 [file 23108231]

## Supporting Information

# Photovoltage Coupled Dual-gate InGaZnO Thin-Film Transistors Operated at Subthreshold Region for Low Power Photodetection

*Ben Xiang<sup>1</sup>, Taoyu Zou<sup>1</sup>, Ya Wang<sup>1</sup>, Chuan Liu<sup>2\*</sup>, Jun Chen<sup>2</sup>, Kai Wang<sup>2</sup>, Qing Dai<sup>3</sup>,*

*Shengdong Zhang<sup>1</sup>, Hang Zhou<sup>1\*</sup>*

1. School of Electronic and Computer Engineering, Peking University Shenzhen

Graduate School, Shenzhen, 518055, China

2. State Key Laboratory of Optoelectronic Materials and Technologies, School of

Electronics and Information Technology, Sun Yat-Sen University, Guangzhou 510006,

China

3. National Center for Nanoscience & Technology, Beijing 100190, China

\*zhouh81@pkusz.edu.cn

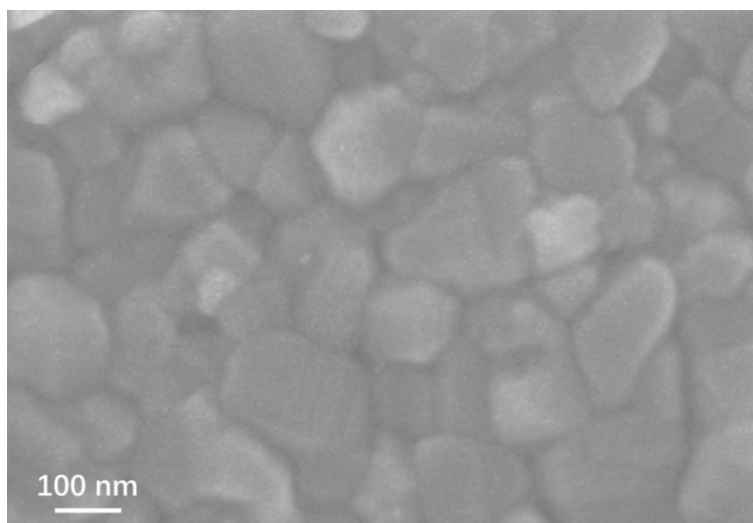

**Figure S1.** SEM image of the thermal evaporated perovskite film.

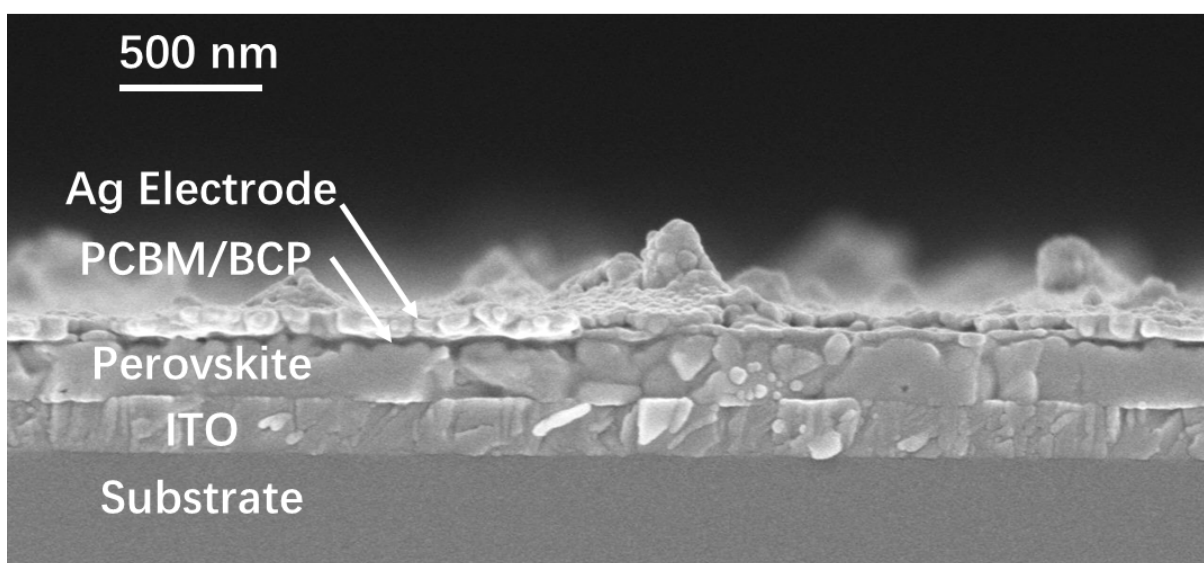

**Figure S2.** The cross-section structures of the thermal evaporated perovskite PD.

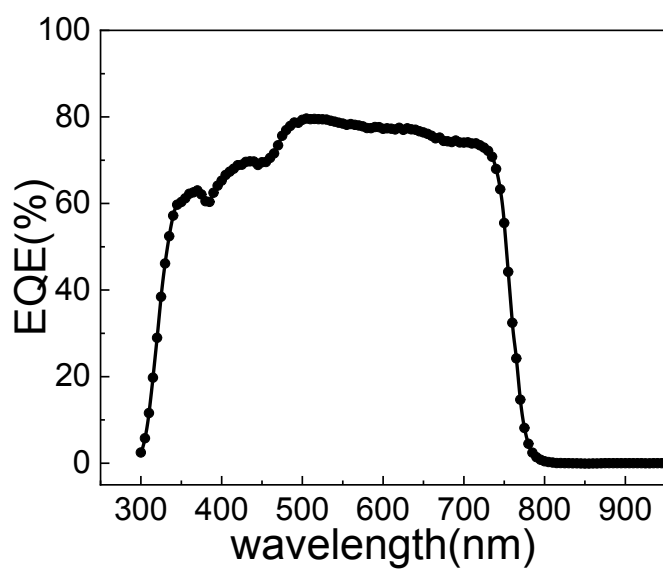

**Figure S3.** EQE results of the thermal evaporated perovskite photodiode.

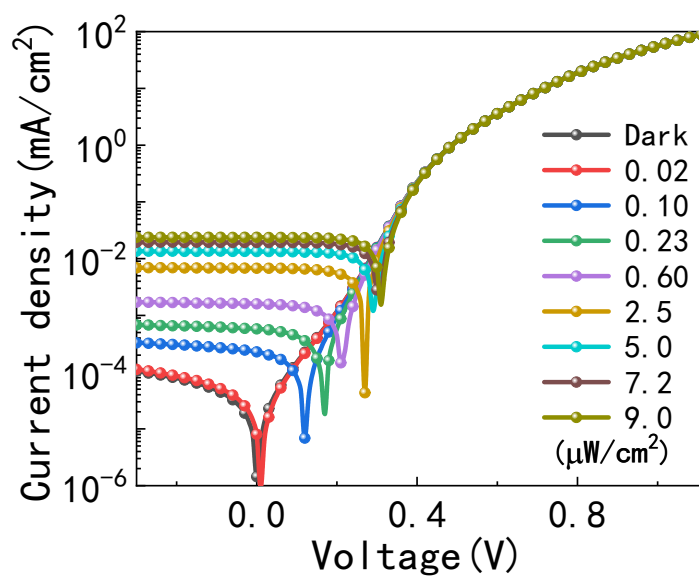

**Figure S4.** The current density-voltage curves of Si-based PD under dark and illumination with different light intensities.

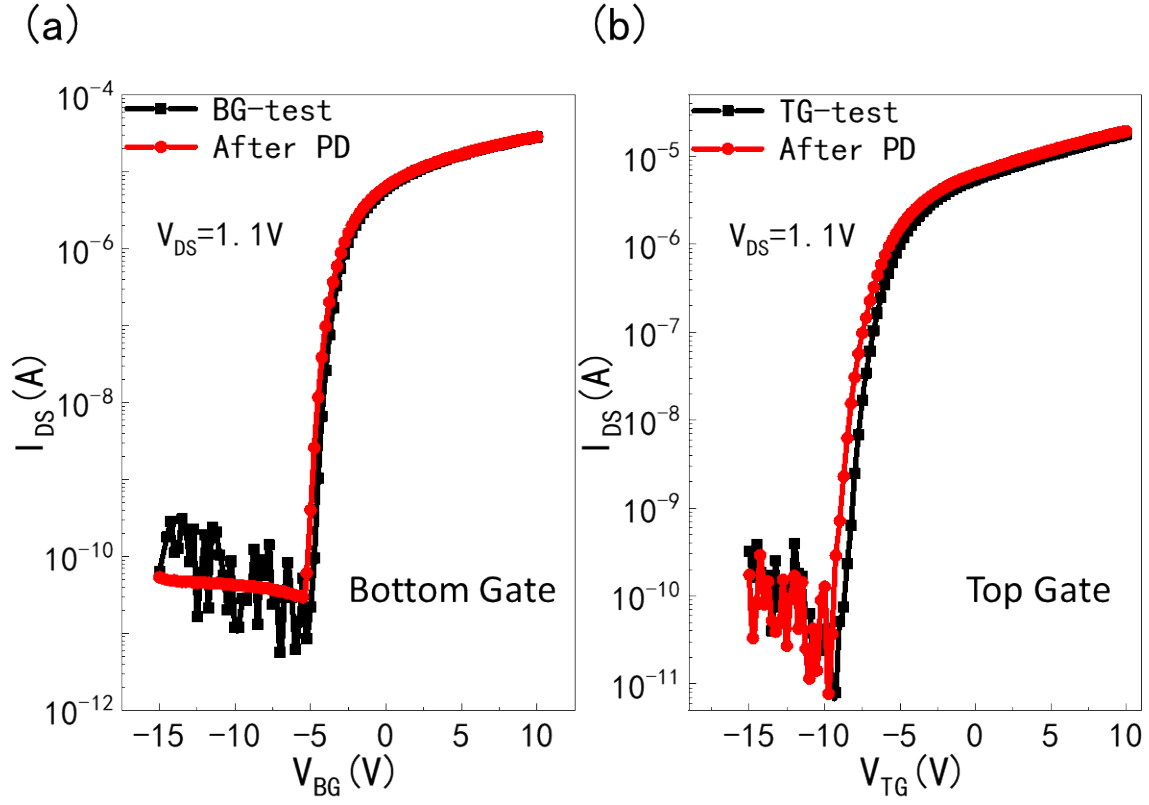

**Figure S5.** The transfer characteristics of DG a-IGZO TFT measured in (a) bottom-gate modes (b) top gate modes before and after the integration of perovskite PD (IGZO/PD).

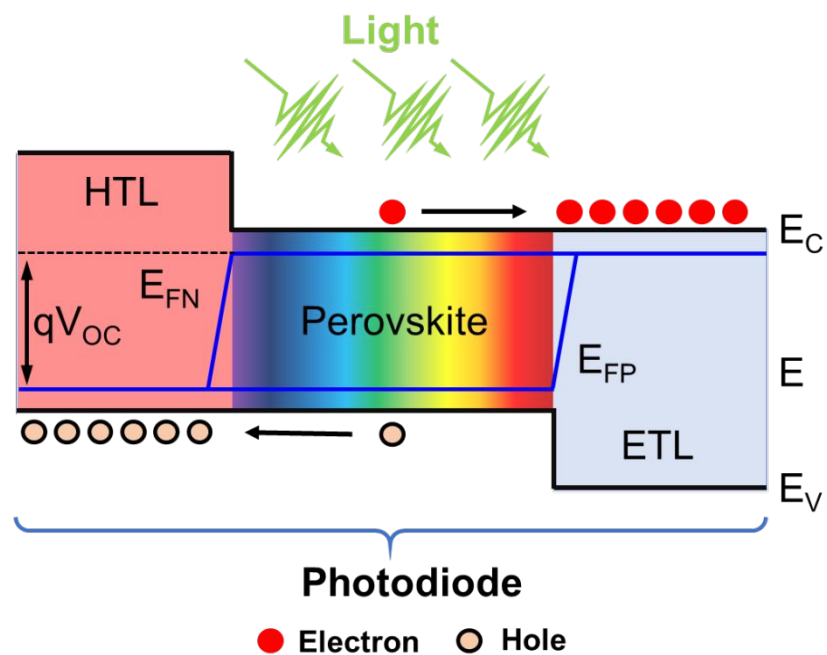

**Figure S6.** The energy band diagram of the integrated perovskite PD under illumination.

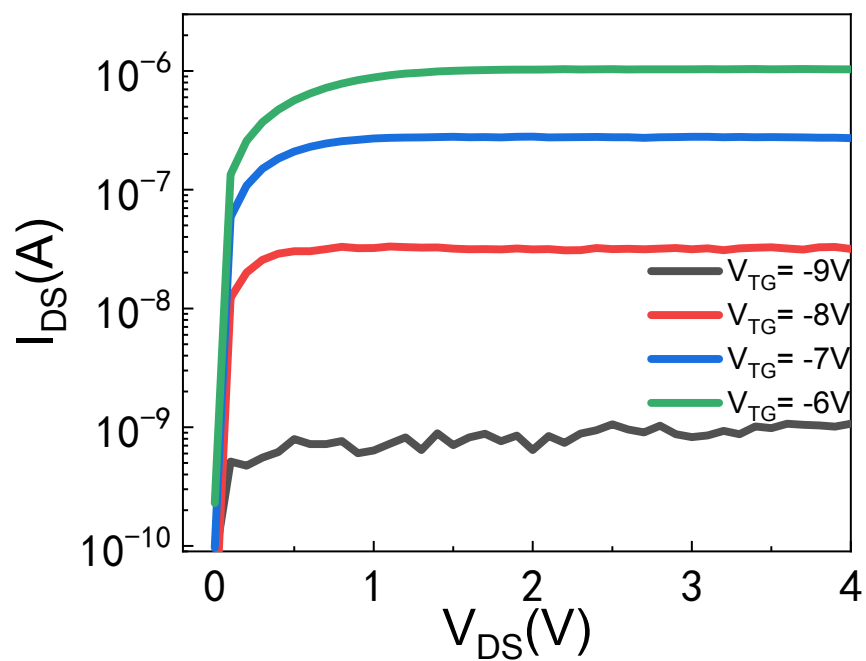

**Figure S7.** The output characteristic curve of the DG a-IGZO TFT in top gate operation mode.

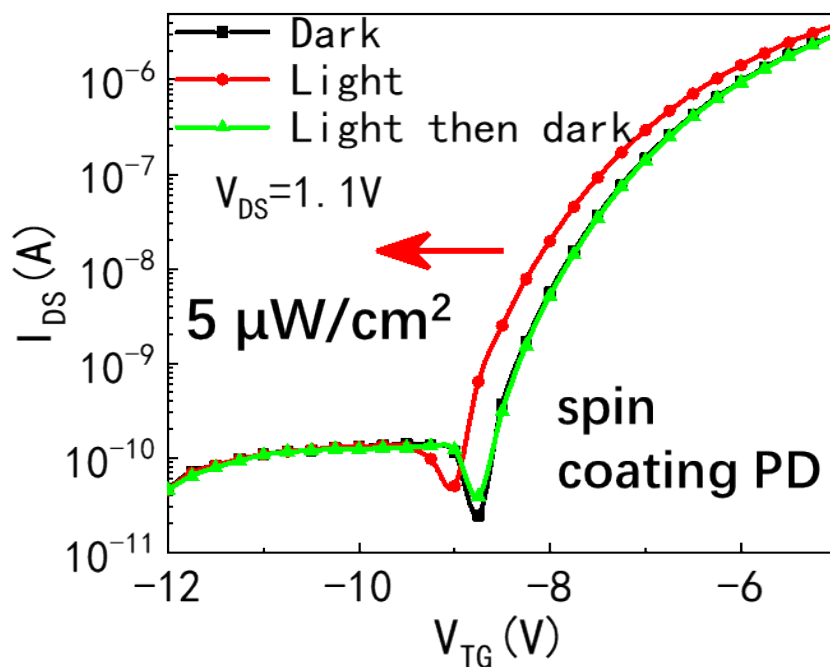

**Figure S8.** The photoresponse of spin coating PD integrated with DG a-IGZO TFT pixel in the log axis. In dark, light illumination with an intensity of  $5 \mu\text{W}/\text{cm}^2$  and after the light illumination, the integrated system can return to the dark state.

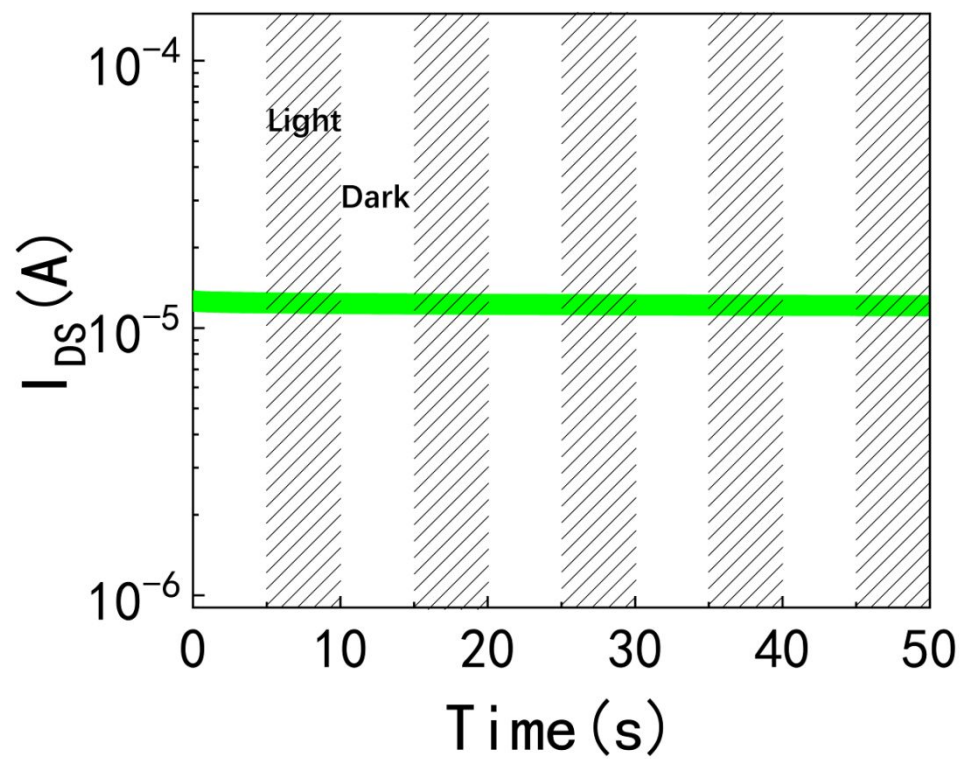

**Figure S9.** The transient response of pristine DG a-IGZO TFT to pulse light. The pristine DG a-IGZO TFT shows no response to the light.
